# Supplementary material
Source: PubMed Central journal article supplement (PMC5129723)
Supplement: supp_pp.16.01371_PP2016-01371R1_Table_S1.pdf [file supp_pp.16.01371_PP2016-01371R1_Table_S1.pdf]

**Supplemental Table S1.** *Analysis of Arabidopsis stress literature based on PubMed search terms*

| PubMed search terms: Arabidopsis + stress <sup>a</sup> + B vitamins or hormones below |                |                 |             |
|---------------------------------------------------------------------------------------|----------------|-----------------|-------------|
| B Vitamin                                                                             | Hits           | Hormone         | Hits        |
| Thiamin                                                                               | 7              | Auxin           | 457         |
| Folate                                                                                | 5              | Gibberellin     | 143         |
| Pyridoxine                                                                            | 18             | Cytokinin       | 148         |
| Nicotinate                                                                            | 3              | Absciscic acid  | 1704        |
| Biotin                                                                                | 0 <sup>b</sup> | Ethylene        | 568         |
| Pantothenate                                                                          | 2              | Jasmonate       | 586         |
| Riboflavin                                                                            | 4              | Salicylic acid  | 561         |
|                                                                                       |                | Nitric oxide    | 169         |
|                                                                                       |                | Brassinosteroid | 78          |
| <b>Total</b>                                                                          | <b>39</b>      | <b>Total</b>    | <b>4414</b> |

<sup>a</sup>Hits from the search term 'stress' encompass diverse abiotic stress studies and include only a small minority (<5%) of studies that involve only biotic stresses.

<sup>b</sup>Curated to remove cases in which biotin was used solely as a reagent.
