# Supplementary material
Source: PubMed Central journal article supplement (PMC5129723)
Supplement: supp_pp.16.01371_PP2016-01371R1_Table_S2.pdf [file supp_pp.16.01371_PP2016-01371R1_Table_S2.pdf]

**Supplemental Table S2.** *Stress-induced B vitamin/cofactor synthesis and salvage genes in Arabidopsis*

| Vitamin      | Gene names <sup>a</sup>                                                               | Stresses                                                                                                     | References <sup>b</sup>                                                                                                                        |
|--------------|---------------------------------------------------------------------------------------|--------------------------------------------------------------------------------------------------------------|------------------------------------------------------------------------------------------------------------------------------------------------|
| Biotin       | BioF                                                                                  | Heat                                                                                                         |                                                                                                                                                |
| Folate       | DFD<br>GGH1, GG2, GGH3                                                                | Salt<br>Salt, osmotic, drought, oxidative <sup>c</sup>                                                       |                                                                                                                                                |
| Niacin       | AO<br>QS<br>NMNAT<br>NAPRT2<br>NADK1<br>NADK3<br>NIC3                                 | Cold<br>UV-B<br>Salt<br>Cold, salt<br>Salt, drought, UV-B<br>Cold, salt, osmotic, oxidative<br>Cold, osmotic | Oono et al., 2006                                                                                                                              |
| Pantothenate | PTS<br>HAL3A, Hal3B                                                                   | Heat<br>Salt                                                                                                 | Espinosa-Ruiz et al., 1999                                                                                                                     |
| Pyridoxine   | PDX1.1, 1.3<br>PDX1.3<br>PDX1.2<br>PDX1.2<br>PDX1.2<br>PDX1.2<br>PDX2                 | Cold, drought, light<br>UV-B<br>Oxidative<br>Heat<br>Heat, oxidative<br>Heat<br>Cold, drought, light         | Denslow et al., 2007<br>Brosché et al., 2002<br>Denslow et al., 2007<br>Moccand et al., 2014<br>Leuendorf et al., 2014<br>Denslow et al., 2007 |
| Riboflavin   | GCH<br>PyrD (At4g20960)<br>PyrR (At3g47390)<br>FMN/FHY<br>RIBF2 (At5g08340)<br>NUDX23 | Salt<br>Salt<br>Salt<br>Osmotic<br>Heat<br>Salt                                                              |                                                                                                                                                |
| Thiamin      | ThiC, THI1, TH1, TPK1<br>ThiC, THI1, TH1, TPK1<br>ThiC<br>TenA_E (At3g16990)          | Salt, osmotic<br>Oxidative<br>Heat + drought<br>Osmotic, salt, UV-B                                          | Rapala-Kozik et al., 2012<br>Tunc-Ozdemir et al., 2009<br>Rizhsky et al., 2004                                                                 |

<sup>a</sup>Provisional or ambiguous gene names are accompanied by AGI locus codes; AGI locus codes for all other genes are available at <http://pubseed.theseed.org/seedviewer.cgi?page=PlantGateway>.

<sup>b</sup>Where no reference is indicated, data are from AtGenExpress (Hahn et al., 2013), the criterion for stress induction being a consistent  $\geq 2$ -fold increase relative to the control in roots or shoots.

<sup>c</sup>GGH1, GGH2, and GGH3 each respond to one or more of these stresses.

## References

- Brosché M, Schuler MA, Kalbina I, Connor L, Strid A (2002) Gene regulation by low level UV-B radiation: identification by DNA array analysis. *Photochem Photobiol Sci* 1: 656-664
- Denslow SA, Rueschhoff EE, Daub ME (2007) Regulation of the *Arabidopsis thaliana* vitamin B6 biosynthesis genes by abiotic stress. *Plant Physiol Biochem* 45: 152-161
- Leuendorf JE, Mooney SL, Chen L, Hellmann HA (2014) *Arabidopsis thaliana* PDX1.2 is critical for embryo development and heat shock tolerance. *Planta* 240: 137-146
- Oono Y, Seki M, Satou M, Iida K, Akiyama K, Sakurai T, Fujita M, Yamaguchi-Shinozaki K, Shinozaki K (2006) Monitoring expression profiles of *Arabidopsis* genes during cold acclimation and deacclimation using DNA microarrays. *Funct Integr Genomics* 6: 212-234
- Rizhsky R, Liang H, Shuman J, Shulaev V, Davletova S, Mittler R (2004) When defense pathways collide. The response of *Arabidopsis* to a combination of drought and heat stress. *Plant Physiol* 134: 1683-1696
